# Supplementary material for: Systematic biology analysis on photosynthetic carbon metabolism of maize leaf following sudden heat shock under elevated CO2
Source: PubMed Central journal article supplement (PMC5959914; doi:10.1038/s41598-018-26283-x), 2018-05-18
Supplement: 41598_2018_26283_MOESM1_ESM.pdf [file 41598_2018_26283_MOESM1_ESM.pdf]

## Supplementary dataset

### **Systematic biology analysis on photosynthetic carbon metabolism of maize leaf following sudden heat shock under elevated CO<sub>2</sub>**

*Mingnan Qu*<sup>1\*</sup>, *Genyun Chen*,<sup>1</sup> *James A. Bunce*<sup>2</sup>, *Xiaocen Zhu*<sup>3</sup>, *Richard C. Sicher*<sup>2</sup>

<sup>1</sup>CAS Center for Excellence in Molecular Plant Sciences, Institute of Plant Physiology and Ecology, Shanghai Institutes for Biological Sciences, Chinese academy of Sciences, 200032 Shanghai, China

<sup>2</sup>USDA-ARS, Crop Systems and Global Change Laboratory, Beltsville, MD 20705 USA

<sup>3</sup>Human Phenome Institute, Fudan University, Shanghai, 200438, China.

**Running title:** Effects of CO<sub>2</sub> on C<sub>4</sub> metabolism recovering from heat shock



|               |      |      |      |      |      |      |      |
|---------------|------|------|------|------|------|------|------|
| Serine        | **** | **** | **** | ns   | ns   | **** | ns   |
| Valine        | **** | **** | **** | **** | **** | **** | **** |
| Threonine     | ns   | ns   | ns   | ns   | ns   | ns   | ns   |
| Proline       | **   | **** | **** | **** | ns   | **   | ns   |
| Putrescine    | ns   | ns   | ns   | ns   | ns   | ns   | ns   |
| Asparagine    | **** | **** | **** | **** | **** | **** | **** |
| Glutamine     | **** | **** | **   | **** | **** | **   | **** |
| Phenylalanine | ns   | *    | ns   | ns   | ns   | ns   | ns   |

---

Note: Symbols “\*”, “\*\*”, “\*\*\*\*”, “\*\*\*\*\*” represent significant levels at  $P < 0.05$ , 0.01, 0.001, or 0.0001, respectively. “ns”: not significant.

**Supplementary Table S2.** Analysis of variance (*ANOVA*) for various carbohydrates, organic acids and amino acids in response to CO<sub>2</sub>, sudden heat shock (SHS), recovery from SHS and their interactions in B106.

| B106          | CO <sub>2</sub> | SHS  | Recover | CO <sub>2</sub> *SHS | CO <sub>2</sub> *Recover | SHSt*Recover | CO <sub>2</sub> *SHS*Recover |
|---------------|-----------------|------|---------|----------------------|--------------------------|--------------|------------------------------|
| Ribose        | ****            | **** | ****    | ****                 | ****                     | ****         | ****                         |
| Fructose      | ****            | **** | ****    | **                   | *                        | ns           | *                            |
| Glucose       | ****            | **** | ****    | ns                   | *                        | ****         | ns                           |
| My-inositol   | **              | **** | ns      | ns                   | ns                       | ns           | ns                           |
| Surcose       | *               | **** | *       | ns                   | ns                       | *            | ns                           |
| Maltose       | ns              | **** | ****    | ****                 | ****                     | **           | ****                         |
| Trehalose     | ****            | **** | ****    | ****                 | ****                     | ****         | ****                         |
| Raffinose     | ns              | ns   | ns      | ns                   | ns                       | ns           | ns                           |
| Starch        | ****            | **** | ****    | ****                 | **                       | ****         | **                           |
| 2-oxoglutaric | ****            | **** | ****    | ns                   | ****                     | ns           | ns                           |
| Quinic        | ns              | **   | *       | ns                   | ns                       | ns           | **                           |
| Adipic        | ****            | **** | ns      | ns                   | *                        | ns           | ns                           |
| Shikimic      | ****            | **** | ****    | ns                   | **                       | ****         | ns                           |
| Pyruvic       | ****            | **** | ****    | ****                 | ns                       | ns           | ns                           |
| Citric        | ***             | ns   | ns      | ns                   | ns                       | ns           | ns                           |
| Aconitic      | **              | **** | ****    | *                    | ****                     | ****         | ns                           |
| Maleic        | ns              | ns   | ns      | ns                   | ns                       | ns           | ns                           |
| Malic acid    | ****            | **** | **      | ****                 | **                       | ****         | ns                           |
| Oxaloacetic   | ****            | **** | ****    | ns                   | ****                     | ****         | **                           |
| Malonic       | ns              | ns   | ns      | ns                   | ns                       | ns           | ns                           |
| Alyceric      | ****            |      | ****    | ****                 | ****                     | ****         | ****                         |
| Fumuric       | **              | **** | ns      | ns                   | ns                       | ns           | ns                           |
| Succinic      | ****            | **** | *       | ns                   | ns                       | **           | ns                           |
| Leucine       | ****            | **** | ****    | ns                   | ****                     | ****         | ****                         |
| Isoleucine    | ****            | **** | *       | ns                   | ns                       | *            | ns                           |
| Alanine       | ns              | **   | **      | ns                   | ns                       | **           | ns                           |
| Glycine       | ****            | **** | ****    | ****                 | ****                     | ****         | ****                         |
| Serine        | ns              | **** | ****    | ****                 | **                       | ****         | ****                         |

|               |      |      |      |      |      |      |      |
|---------------|------|------|------|------|------|------|------|
| Valine        | **** | **** | **** | **** | ***  | **** | **** |
| Threonine     | ns   | ns   | ns   | ns   | ns   | ns   | ns   |
| Proline       | ***  | **** | **** | ns   | **   | **** | ns   |
| Putrescine    | ns   | *    | ns   | ns   | ns   | ns   | ns   |
| Asparagine    | **** | **** | **** | **** | ns   | **** | ns   |
| Glutamine     | **** | **   | **** | **** | **** | **** | **** |
| Phenylalanine | ns   | ns   | ns   | ns   | ns   | ns   | ns   |

---

Note: Symbols “\*”, “\*\*”, “\*\*\*”, “\*\*\*\*” represent significant levels at  $P < 0.05$ , 0.01, 0.001, or 0.0001, respectively. “ns”: not significant.

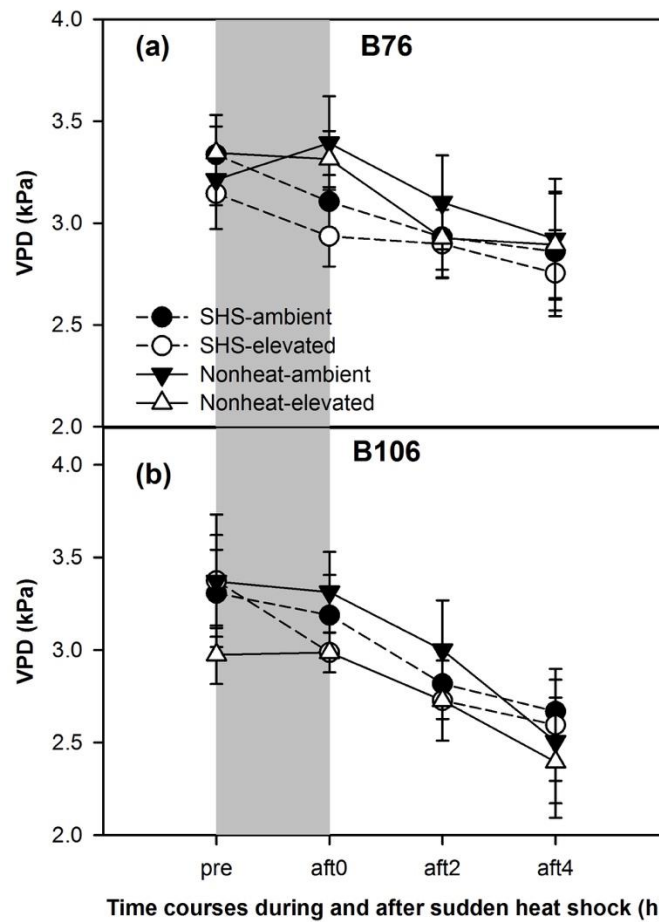

**Supplementary Fig. S1.** Sudden heat shock (SHS) induced decrease and recovery of vapor pressure deficit (VPD) in two maize genotypes grown under elevated CO<sub>2</sub> conditions. Shapes of circle in solid line and triangle in dotted line represent SHS treated leaves and nonheated leaves, respectively, while black and white symbols mean ambient CO<sub>2</sub> and elevated CO<sub>2</sub>, respectively. The grey area represents the period during 2h SHS. Vertical bars represent at two sides of each panel represent significance scale regarding each combination of CO<sub>2</sub> and SHS treatments across during and after SHS from one-way ANOVA analysis, ( $P < 0.05$ ). n=5

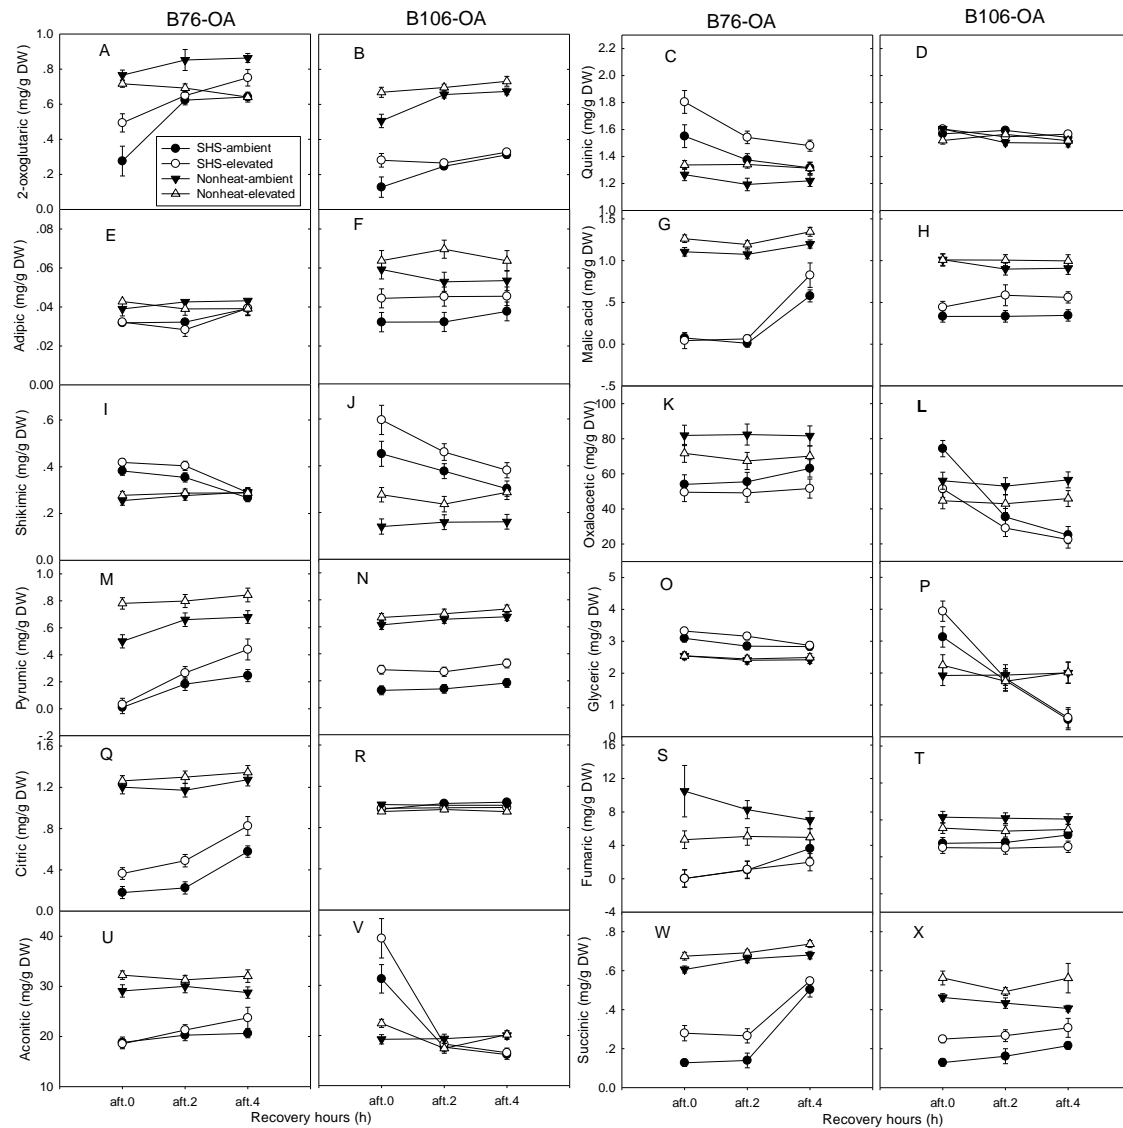

**Supplementary Fig. S2.** Recovery profiling of organic acids (OA) after sudden heat shock (SHS) at different hours in two maize genotypes grown under different CO<sub>2</sub>. SHS-ambient and SHS-elevated represent response of metabolites in SHS leaves grown under ambient and elevated CO<sub>2</sub>, respectively. Nonheat-ambient and Nonheat-elevated represent response of metabolites in nonheated leaves grown under ambient and elevated CO<sub>2</sub>, respectively

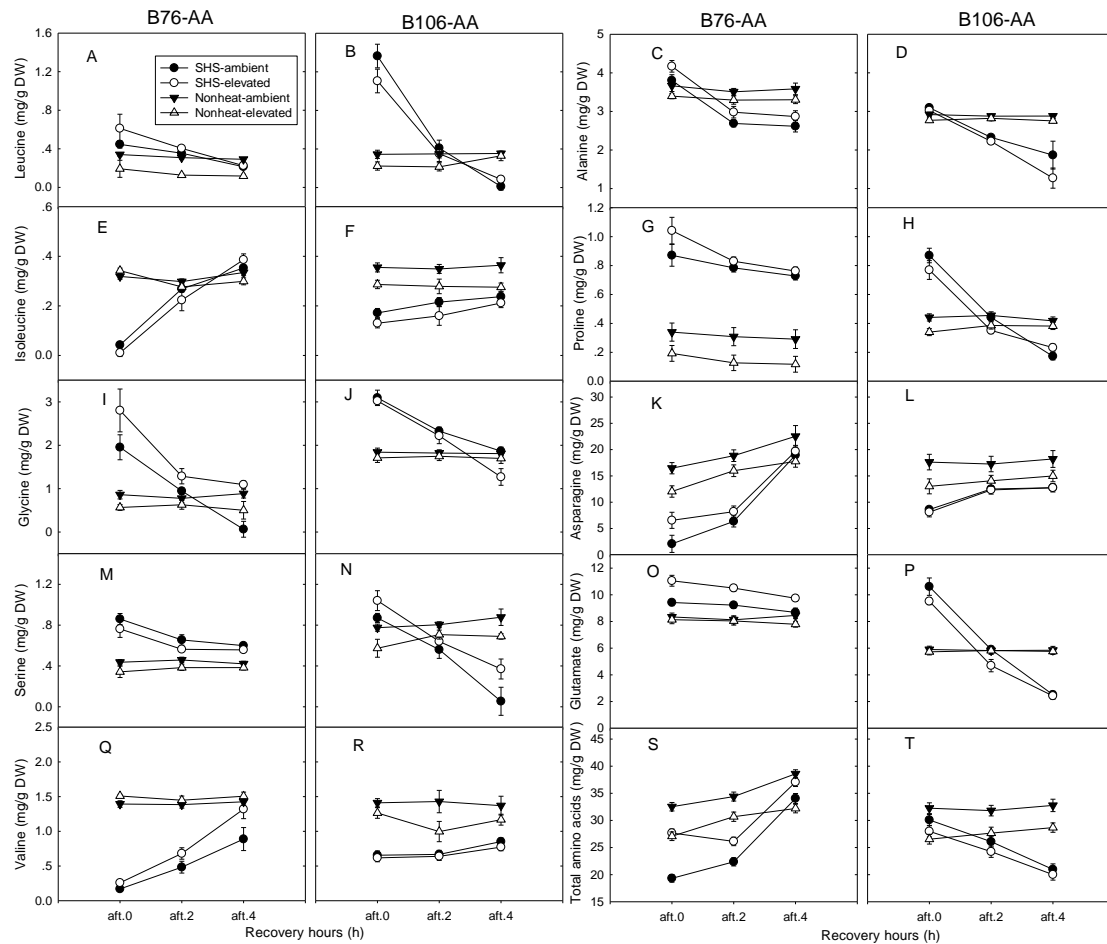

**Supplementary Fig. S3.** Recovery profiling of amino acids (AA) after sudden heat shock (SHS) at different hours in two maize genotypes grown under different CO<sub>2</sub>. SHS-ambient and SHS-elevated represent response of metabolites in SHS leaves grown under ambient and elevated CO<sub>2</sub>, respectively. Nonheat-ambient and Nonheat-elevated represent response of metabolites in nonheated leaves grown under ambient and elevated CO<sub>2</sub>, respectively.



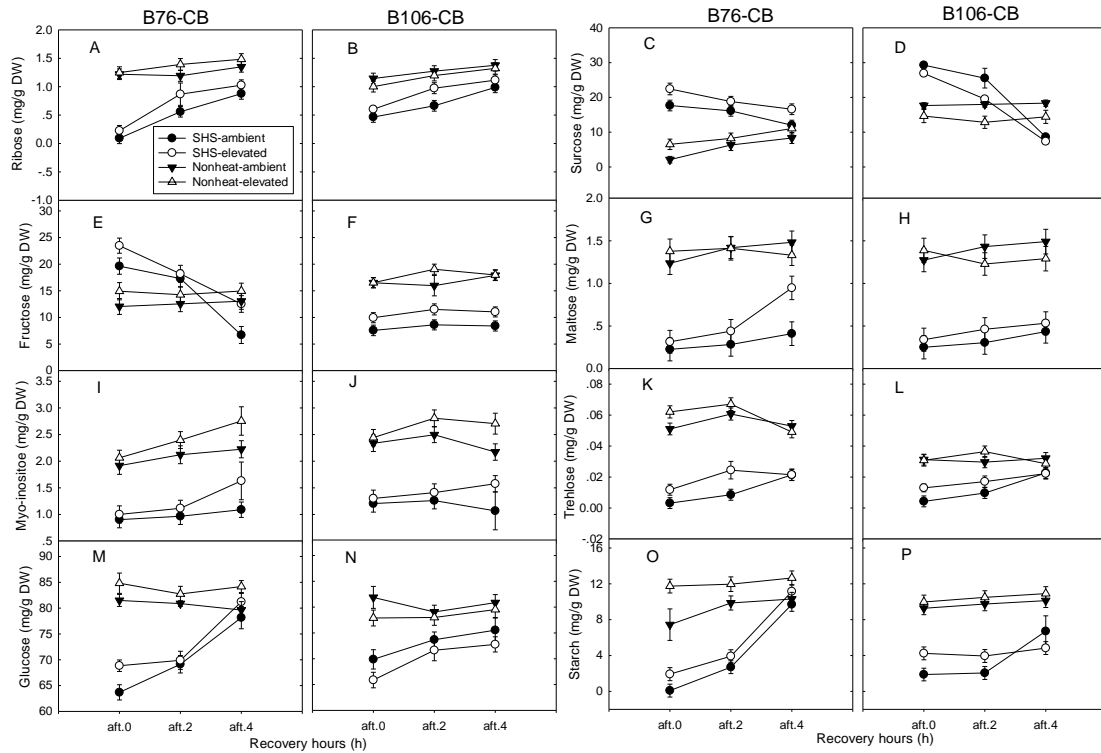

**Supplementary Fig. S4.** Recovery profiling of carbohydrates (CB) after sudden heat shock (SHS) at different hours in two maize genotypes grown under different CO<sub>2</sub>. SHS-ambient and SHS-elevated represent response of metabolites in SHS leaves grown under ambient and elevated CO<sub>2</sub>, respectively. Nonheat-ambient and Nonheat-elevated represent response of metabolites in nonheated leaves grown under ambient and elevated CO<sub>2</sub>, respectively.

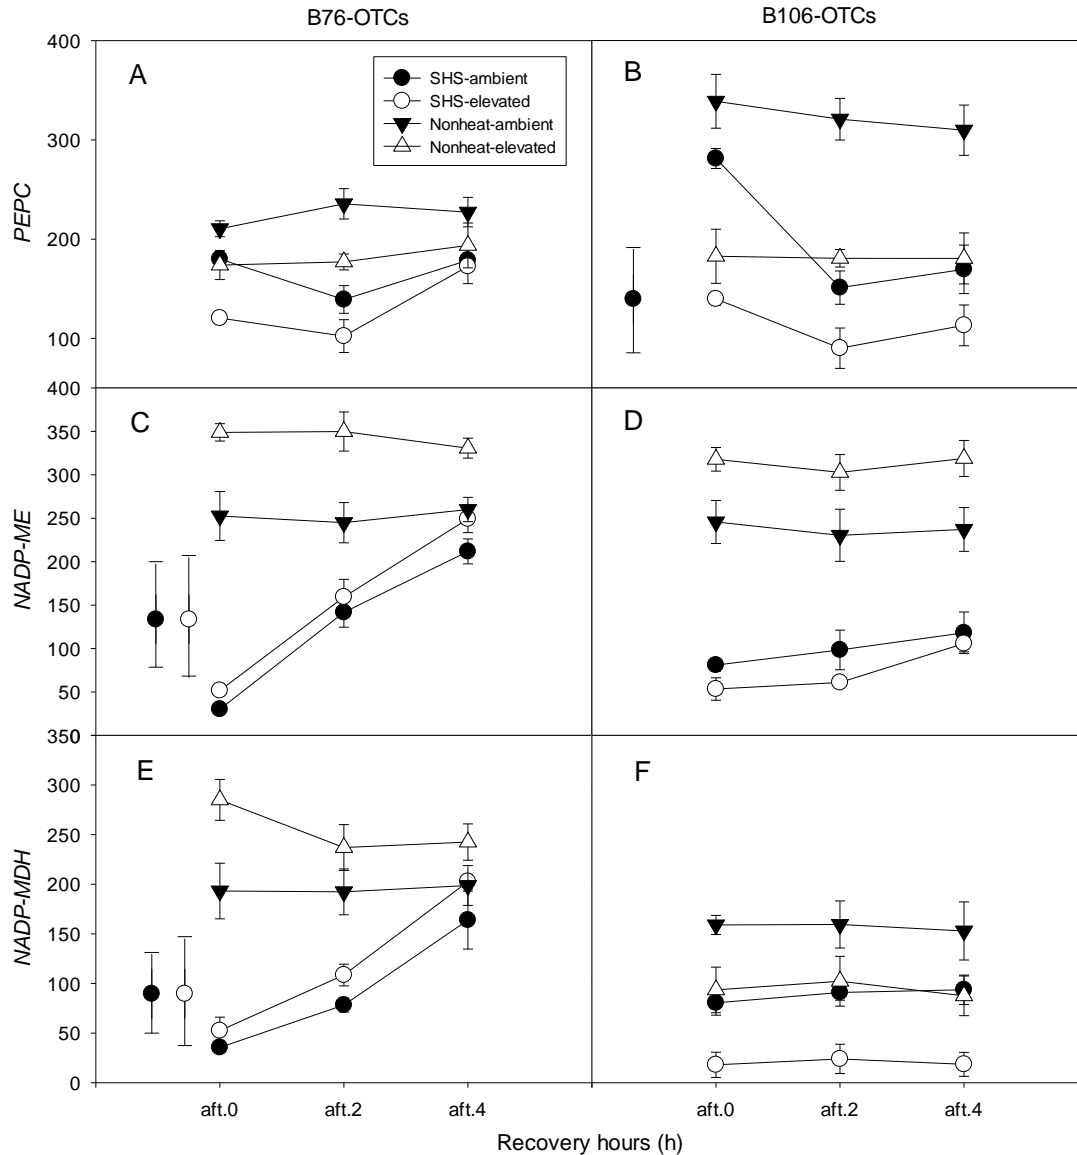

**Supplementary Fig S5.** Gene expression of three C<sub>4</sub> decarboxylating enzymes in response to recovery from sudden heat shock (SHS) in two maize genotypes grown under two CO<sub>2</sub> levels. Shapes of circle and triangle represent SHS treated leaves and nonheated leaves, respectively, while black and white symbols mean ambient CO<sub>2</sub> and elevated CO<sub>2</sub>, respectively. The grey area represents the period during 2h SHS. Vertical bars represent at two sides of each panel represent significance scale regarding each combination of CO<sub>2</sub> and SHS treatments across during and after SHS from one-way ANOVA analysis, ( $P < 0.05$ ). n=3-5.

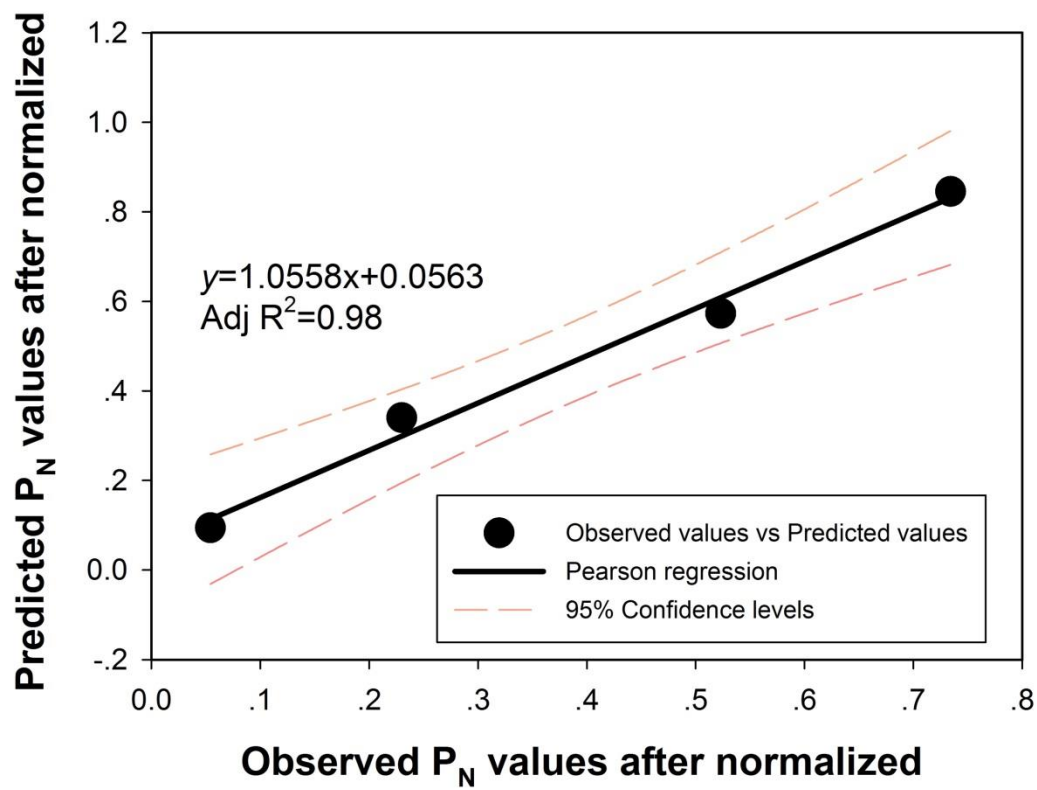

**Supplementary Fig. S6.** Prediction of photosynthetic rates ( $P_N$ ) from test dataset using linear regression model. The values of  $P_N$  was normalized between 0~1.
